# Supplementary material for: An immune biomarker associated with EMT serves as a predictor for prognosis and drug response in bladder cancer
Source: publisher site journal article supplement (doi:10.18632/aging.205927), 2024-07-08
Supplement: Supplementary file [file aging-v16-205927-supplementary-material-SD1.pdf]

**SUPPLEMENTARY FIGURE**

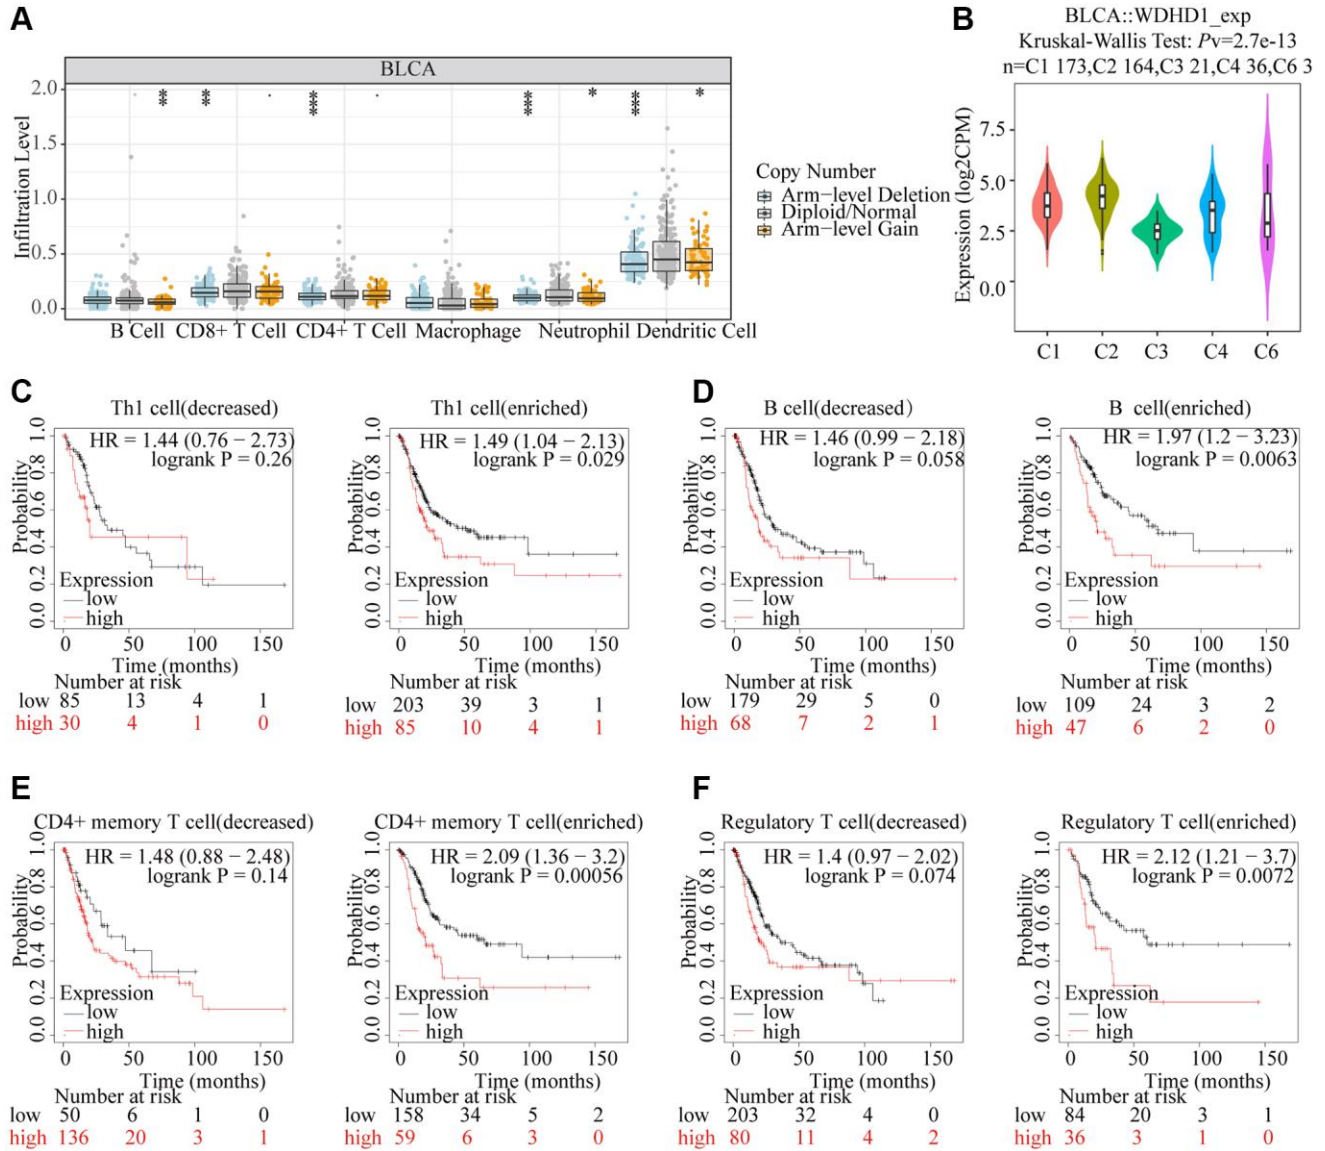

**Supplementary Figure 1. Associations among WDHD1, tumor immune infiltrating cells and prognosis. (A)** WDHD1 CNV affects the infiltrating levels of B cell, CD4+ T cell, macrophages, neutrophils, and dendritic cell in BLCA. **(B)** WDHD1 mRNA expression in different immune subtypes in BLCA. **(C-F)** Prognosis of BLCA patients with WDHD1 expression at high/low infiltration of Th1 cells, B cells, CD4+ memory T cells and regulatory T cells.
